# Supplementary material for: Establishment of High-Efficiency Screening System for Gene Deletion in Fusarium venenatum TB01
Source: MDPI journal article supplement (doi:10.3390/jof8020169), 2022-02-10
Supplement: s1 [file s1]

## Article

# Supplementary Materials: Establishment of High-Efficiency Screening System for Gene Deletion in *Fusarium venenatum* TB01

Sheng Tong <sup>1,2</sup>, Kexin An <sup>1,2</sup>, Wenyuan Zhou <sup>1,2</sup>, Wuxi Chen <sup>1,2</sup>, Yuanxia Sun <sup>1,2</sup>, Qinhong Wang <sup>1,2</sup> and Demao Li <sup>1,2,\*</sup>

**Table S1.** The formulations of medium and reagent in this study.

| Name    | Formulation (L)                                                                                                                                                                         | Use                                              |
|---------|-----------------------------------------------------------------------------------------------------------------------------------------------------------------------------------------|--------------------------------------------------|
| LB      | NaCl 10 g, Yeast extract 5 g, Tryptone 10 g                                                                                                                                             | Cultivation of <i>E. coli</i>                    |
| GYB     | Glucose 20 g, Yeast extract 10 g                                                                                                                                                        |                                                  |
| CMC-Na  | CMC-Na 10 g, NH <sub>4</sub> SO <sub>4</sub> 5 g, Yeast extract 1 g, MgSO <sub>4</sub> 1.5 g, KH <sub>2</sub> PO <sub>4</sub> 2 g, KCl 0.7 g, Na <sub>2</sub> SO <sub>4</sub> 0.5 g     |                                                  |
| CZB     | NaNO <sub>3</sub> 2 g, Sucrose 30 g, MgSO <sub>4</sub> ·7 H <sub>2</sub> O 0.5 g, FeSO <sub>4</sub> ·7 H <sub>2</sub> O 0.001 g, K <sub>2</sub> HPO <sub>4</sub> 1 g, KCl 0.5 g; pH 7.0 | Cultivation of <i>F. venenatum</i>               |
| 1/2 SDB | Glucose 10 g, Tryptone 2.5 g, Yeast extract 5 g                                                                                                                                         |                                                  |
| PDB     | 26 g powder                                                                                                                                                                             |                                                  |
| YEPD    | Yeast extract 3g, Tryptone 10g, Glucose 20g                                                                                                                                             |                                                  |
| RM*     | Yeast extract 1 g, Tryptone 1 g, Sucrose 274 g                                                                                                                                          | Protoplast transformation of <i>F. venenatum</i> |
| STC     | 0.8 Msorbitol, 50 mM CaCl <sub>2</sub> , 50 mM Tris-HCl; Ph 8.0                                                                                                                         |                                                  |
| SPTC    | 40 % PEG6000 in STC                                                                                                                                                                     |                                                  |

The solid medium requires 1.5% (w/v) agar. \* Agarose (1% (w/v)) instead of agar.

**Table S2.** Primers used in this study.

| Name    | Sequence (5' to 3')                                | Use                    |
|---------|----------------------------------------------------|------------------------|
| PChsLB1 | ACAGCTATGACCATGATTACGAATTCGGTTCGGTTGTGCTCGTTTC     | Targeted gene knockout |
| PChsLB2 | CAATGTCATCTTCTGTGCGACACTAGTGGTTTGGTTGGTGTGGGAGTG   |                        |
| PChsLB3 | ACAGGTACACTTGTCTTAGAGGCACTAGTTGGTTCGGTTGTGCTCGTTTC |                        |
| PChsRB1 | GTTTAGAGGTAATCCTTCTTTCTAGAGCTTTCGGTCATTATCCTCC     |                        |
| PChsRB2 | GCTTGCATGCCTGCAGGTCGACTCTAGAGAGCGAGAACCACCTGAACA   |                        |
| PAzfLB1 | ACAGCTATGACCATGATTACGAATTCGGAAGTGGGGATACATCAG      |                        |
| PAzfLB2 | CAATGTCATCTTCTGTGCGACACTAGTGAGTCAGGACGCAAAGAGACC   |                        |
| PAzfRB1 | GTTTAGAGGTAATCCTTCTTTCTAGATTCAGCGCAAGGCAGAGATG     |                        |
| PAzfRB2 | GCTTGCATGCCTGCAGGTCGACTCTAGAACTCTCGCTCCTCCATCTTC   |                        |
| PKuLB1  | ACAGCTATGACCATGATTACGAATTCGGTCTTAGTTGGAGTTGGTG     |                        |
| PKuLB2  | CAATGTCATCTTCTGTGCGACACTAGTGGGATATCTACAAGCCAGCTC   |                        |
| PKuRB1  | GTTTAGAGGTAATCCTTCTTTCTAGAGTGAAGACGTCAGGCTCTA      |                        |

|         |                                                                   |                              |
|---------|-------------------------------------------------------------------|------------------------------|
| PKuRB2  | GCTTGCATGCCTGCAGGTCGACTCTAGATATGCCTAACACTCCGCTCA                  |                              |
| PChsy1  | CACTCCCACACCAACCAAAC                                              |                              |
| PChsy2  | GGTCAGGAGGATAATGACCG                                              |                              |
| PChsy3  | TATCTGGCGCTCTGTATGAACG                                            |                              |
| PChsy4  | AGTTCGGTTTCAGGCAGGTC                                              |                              |
| PChsy5  | CTGTCGGGCGTACACAAATC                                              |                              |
| PChsy6  | CCATGGTACCCGGATAGAAC                                              |                              |
| PChsy7  | GCACCAGCCCACAATCCTTT                                              | Transformants<br>screening   |
| PChsy8  | TCGACTCGTTTGTTCGGGG                                               |                              |
| PAzfy1  | GGTCTCTTTGCGTCCTGACT                                              |                              |
| PAzfy2  | CATCTCTGCCTTGCCTGAA                                               |                              |
| PKuy1   | GAGCTGGCTTGTAGATATCC                                              |                              |
| PKuy2   | TAGAGCCTTGACGTCTTAC                                               |                              |
| PKuy3   | GGAACTACGGTATTCCAAG                                               |                              |
| PKuy4   | AATGTCCTCGTTCCTGTCTGC                                             |                              |
| PgpdA1  | TATGACCATGATTACGAATTCGGTGTGATCGTCAACCAAGTCC                       |                              |
| PgpdA2  | CACCATGGTGGCGACGAATTTTGTAAAGGAGTTCTGTTTGAGGAAA-<br>GAT            |                              |
| Pgla1   | TATGACCATGATTACGAATTGAATACTT-<br>GTTTCAGCGTTACAATTCCTTTTGA        |                              |
| Pgla2   | CACCATGGTGGCGACGAATTTTATTTTGTCTTTTCTAAATTT-<br>GATTGTATATCCTAAGGT | eGFP overex-<br>pression     |
| Ptef1   | TATGACCATGATTACGAATTCACCCGTGGGGAGCTGTAT                           |                              |
| Ptef2   | CACCATGGTGGCGACGAATTATTGTTAACTGGATCAGTCAAGTGG-<br>TAGATAG         |                              |
| Pgfp-T1 | GTCGCCACCATGGTGAGCAA                                              |                              |
| Pgfp-T2 | CATCTTCTGTCGACACTAGTGCCTCTAAACAAGGTACCTG                          |                              |
| PpKLB1  | GGTGGCAGGATATATTGTGG                                              | Amplification of<br>cassette |
| PpKLB2  | TTGGTTGGTCAAGTCTCTGGT                                             |                              |

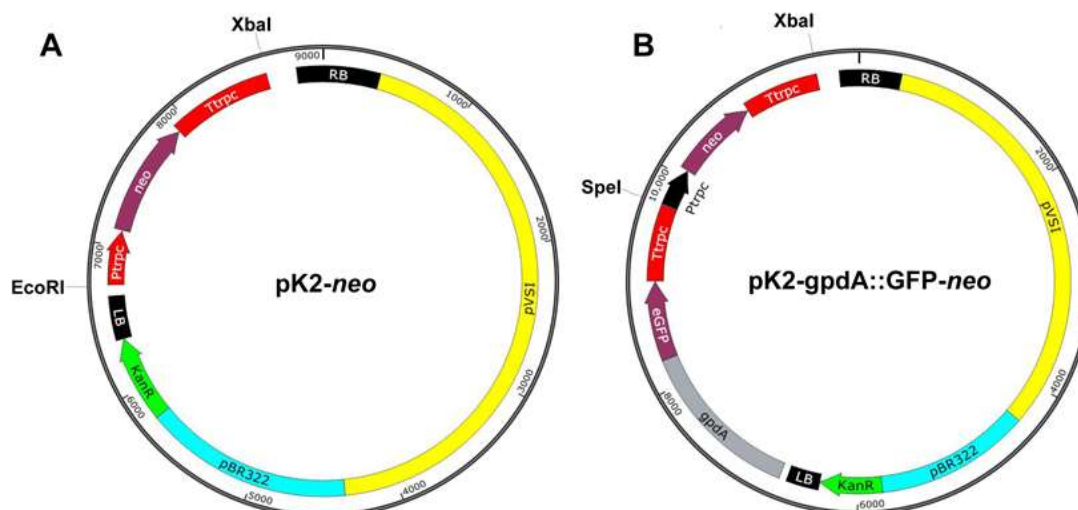

**Figure S1.** Vector map of pK2-neo (A) and pK2-gpdA::GFP-neo (B). The upstream fragment (5' flank) of the target knockout region was cloned into the *EcoRI* site of pK2-neo; the downstream fragment (3' flank) of the target knockout region was cloned into the *XbaI* site of pK2-neo; and the *Chs* knockout cassette was cloned into the site between *PmeI* and *XbaI* of pK2-gpdA::GFP-neo.

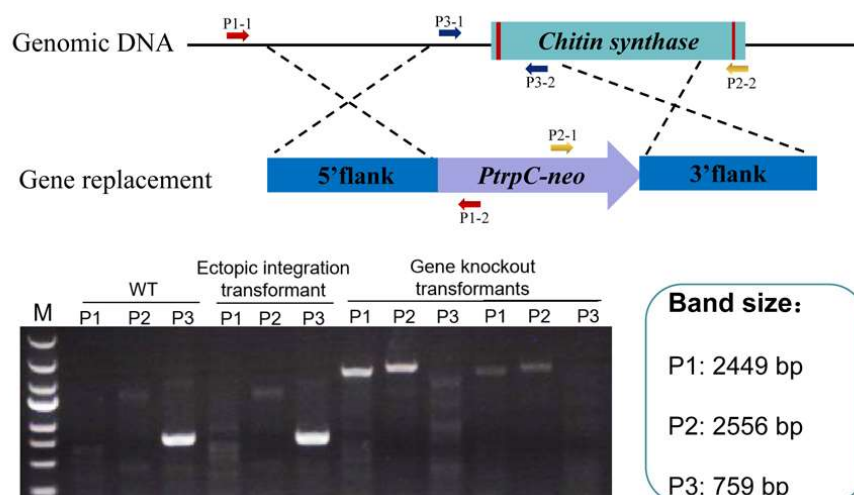

**Figure S2.** PCR analysis of *Chs* deletion transformants. The primer pairs are shown with arrows, and the predicted sizes of the PCR products are shown inside the rounded rectangle. P1-1 and P2-2 were located in the upstream of the 5' flank and downstream of the 3' flank in the genomic DNA, respectively; P1-2 and P2-1 were located in the *neo* gene cassette; P3-1 and P3-2 were located in the *Chs* knockout region. In the *Chs* deleting transformants, PCR bands of 2449 bp and 2556 bp were obtained by primer pairs P1 and P2, respectively. Red rectangles in genomic DNA indicate the intron regions of target gene.

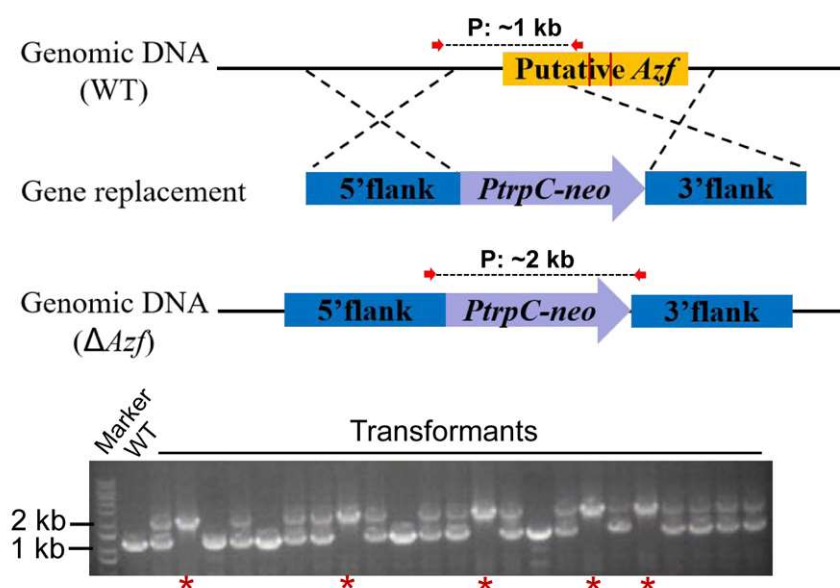

**Figure S3.** PCR analysis of *Azf* deletion transformants. The primers located in the 5' flank and 3' flank of the *Azf* knockout region are shown by red arrows, and the predicted sizes of PCR products in the wild type (~1 kb) and  $\Delta Azf$  mutant (~2 kb) are shown by dashed lines. The ectopic insertion mutant contained both bands (~1 kb and ~2 kb). Electrophoresis images displayed partial results of transformant screening. The confirmed  $\Delta Azf$  mutants are indicated with red asterisks. Red rectangles in genomic DNA indicate the intron regions of target gene.

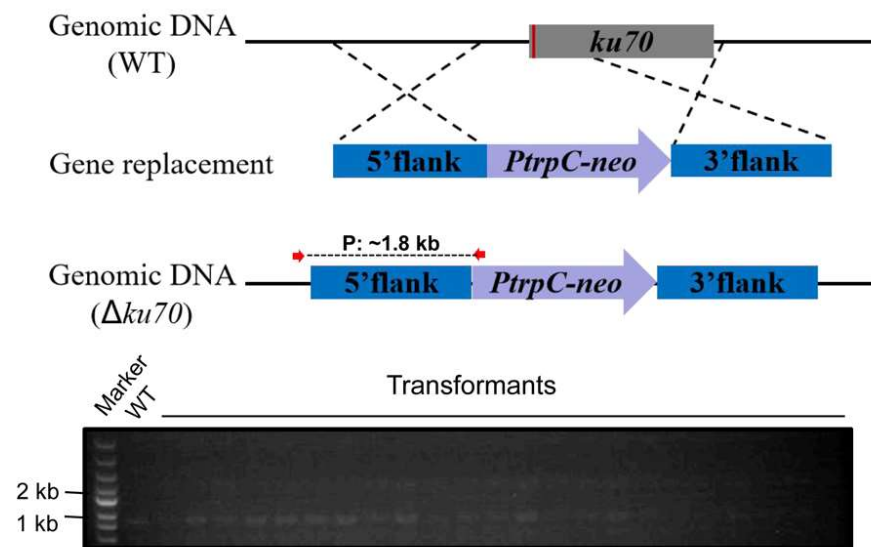

**Figure S4.** PCR analysis of *ku70* deletion transformants. The primer pair with one location in the *neo* gene cassette and the other location in the upstream of the 5' flank in the genomic DNA for diagnostic PCR are shown by red arrows, and the predicted size of PCR product in the  $\Delta ku70$  mutant (~1.8 kb) is shown by the dashed line. The results indicated that no *ku70* deletion transformant was identified. Electrophoresis images display partial results of transformant screening. Red rectangle in genomic DNA indicate the intron region of target gene.

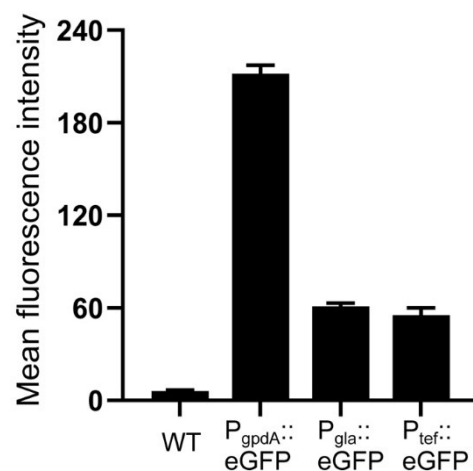

**Figure S5.** Quantification of the mean fluorescence intensity of fluorescent strains by ImageJ software. The *eGFP* reporter gene was driven by the endogenous promoters of *gpdA* (glyceraldehyde-3-phosphate dehydrogenase gene), *gla* (glucoamylase gene), and *tef* (translation elongation factor gene). Error bars = SD.
